# Supplementary material for: Electrochemical Synthesis-Dependent Photoelectrochemical Properties of Tungsten Oxide Powders
Source: MDPI journal article supplement (doi:10.3390/chemengineering6020031), 2022-04-15
Supplement: s1 [file s1]

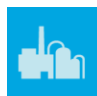

# Supplementary Material: Electrochemical synthesis-dependent photoelectrochemical properties of tungsten oxide powders

Anastasia Tsarenko, Mikhail Gorshenkov, Aleksey Yatsenko, Denis Zhigunov, Vera Butova, Vasily Kaichev and Anna Ulyankina

**Table S1.** Fitting data of XRD patterns of WO<sub>3</sub> samples using MAUD software.

| Sample              | Lattice parameters [Å]              | ICSD entry                |
|---------------------|-------------------------------------|---------------------------|
| WO <sub>3</sub> -OA | WO <sub>3</sub> P 2 <sub>1</sub> /n |                           |
|                     | a = 7.316(5)                        |                           |
|                     | b = 7.512(8)                        |                           |
|                     | c = 7.683(3)                        |                           |
| WO <sub>3</sub> -SA | β = 90.56(9)                        |                           |
|                     | WO <sub>3</sub> P 2 <sub>1</sub> /n | 80056 P 2 <sub>1</sub> /n |
|                     | a = 7.323(3)                        | a = 7.30084(7)            |
|                     | b = 7.510(1)                        | b = 7.53889(7)            |
|                     | c = 7.678(7)                        | c = 7.68962(8)            |
| WO <sub>3</sub> -NA | β = 90.47(2)                        | β = 90.892(1)             |
|                     | WO <sub>3</sub> P 2 <sub>1</sub> /n |                           |
|                     | a = 7.346(3)                        |                           |
|                     | b = 7.536(9)                        |                           |
|                     | c = 7.7063(1)                       |                           |
|                     | β = 90.44(6)                        |                           |

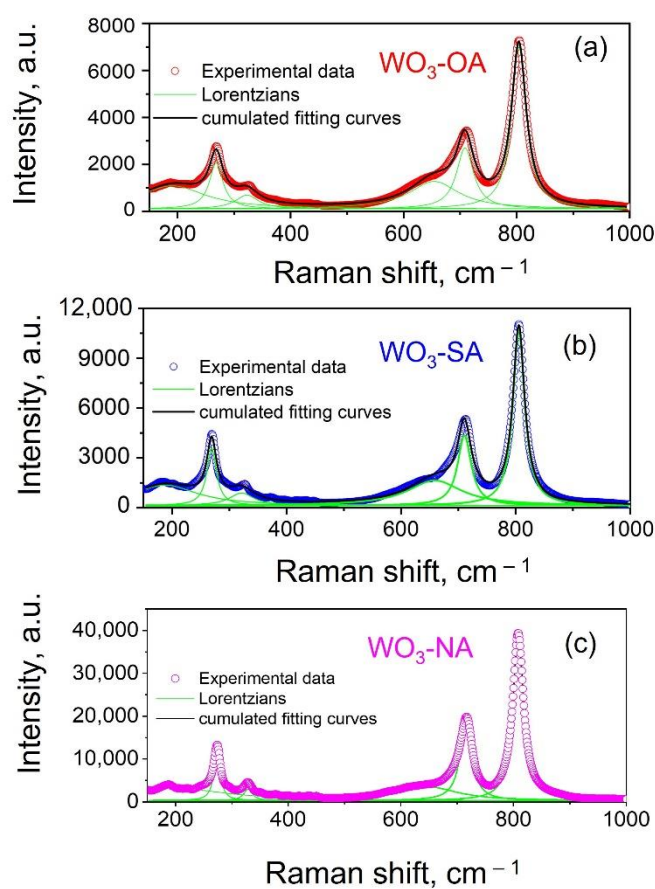

**Figure S1.** Lorentzian curve fitting for Raman spectra of  $\text{WO}_3$ -OA (a),  $\text{WO}_3$ -SA (b) and  $\text{WO}_3$ -NA (c) samples.

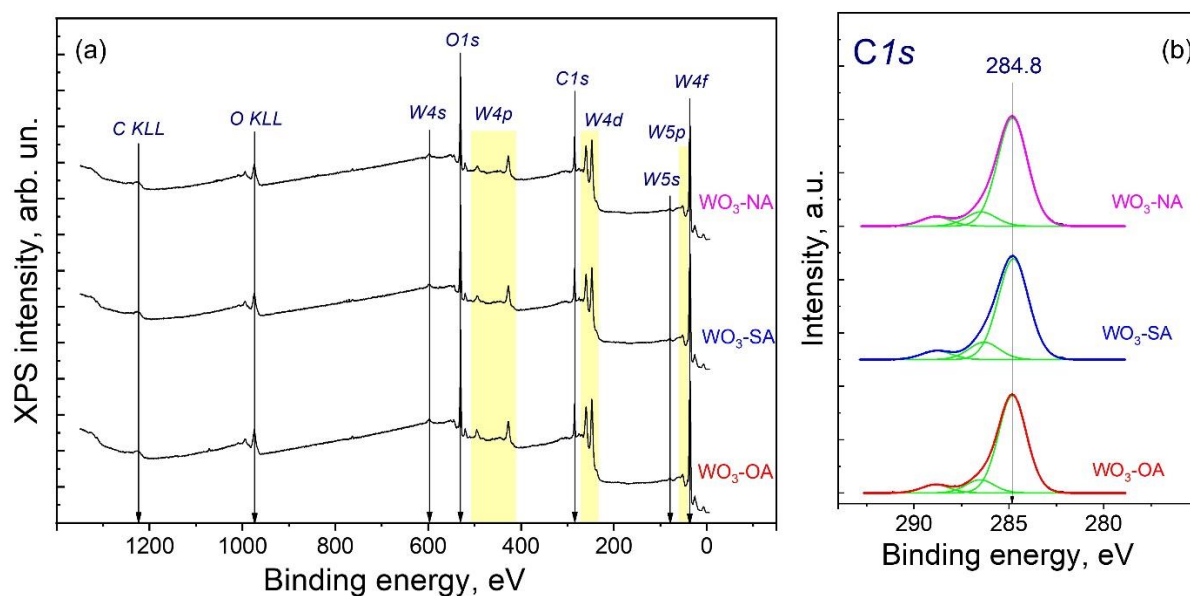

**Figure S2.** XPS survey (a) and C1s (b) spectra of  $\text{WO}_3$ -OA,  $\text{WO}_3$ -SA and  $\text{WO}_3$ -NA (c) samples.

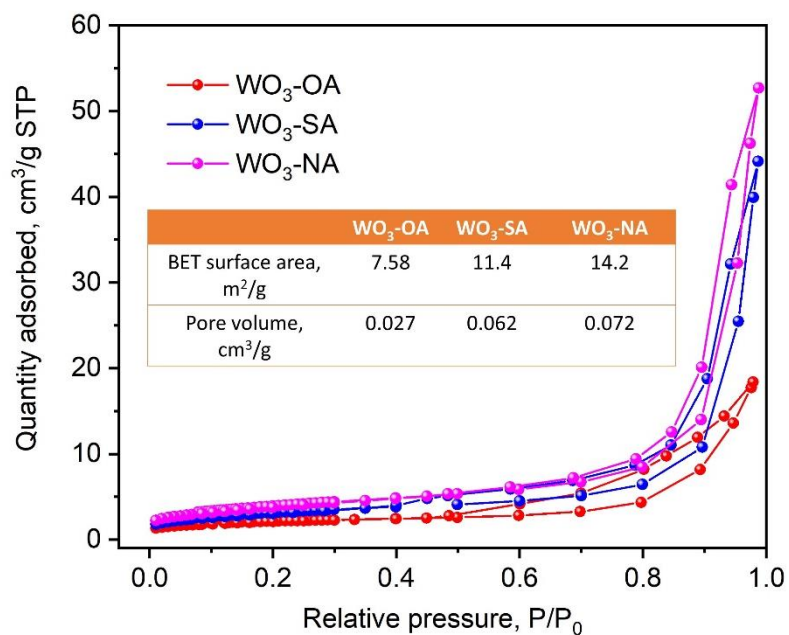

**Figure S3.** Nitrogen adsorption–desorption isotherms of WO<sub>3</sub>-OA (a), WO<sub>3</sub>-SA (b) and WO<sub>3</sub>-NA (c) samples. Inset table shows the corresponding BET surface areas and pore volume values.

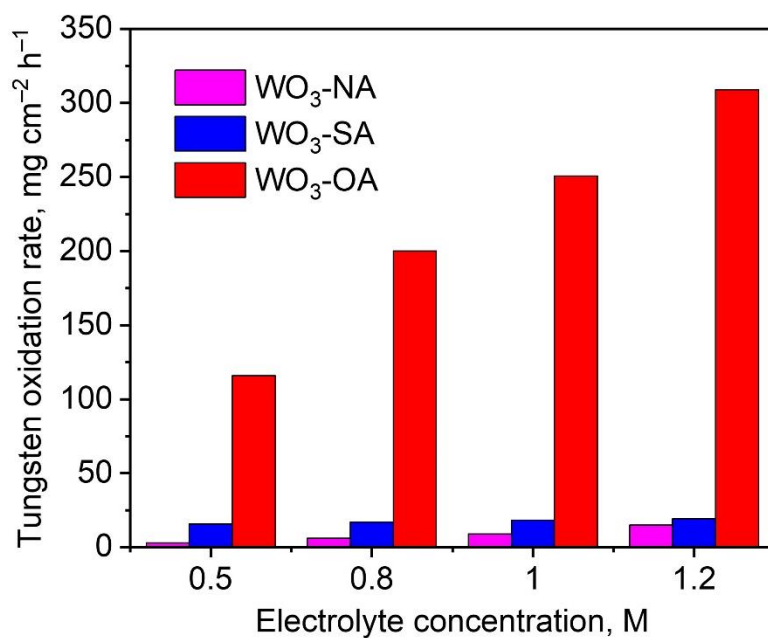

**Figure S4.** Effect of electrolyte concentration on tungsten electrochemical oxidation rate using different electrolytes.

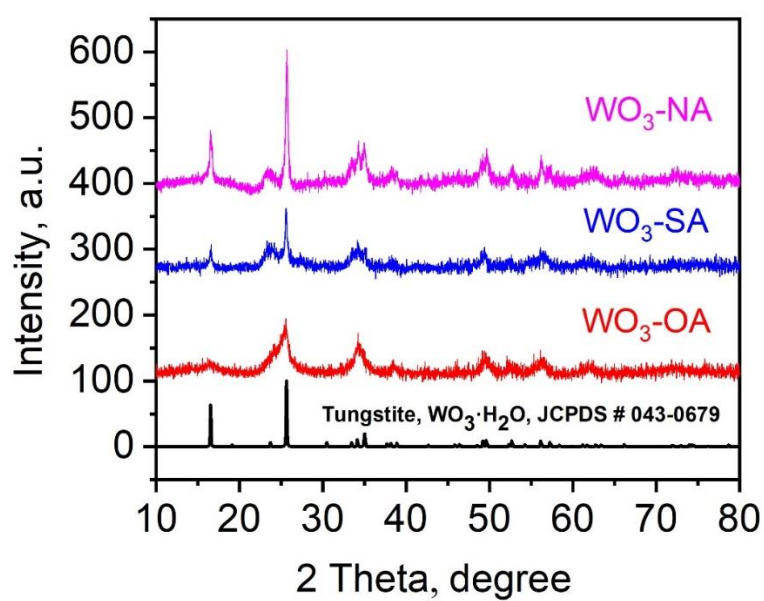

**Figure S5.** XRD patterns of the as-prepared powders by electrochemical oxidation of tungsten under pulse alternating current in comparison with the reference pattern of tungstite  $\text{WO}_3 \cdot \text{H}_2\text{O}$ .

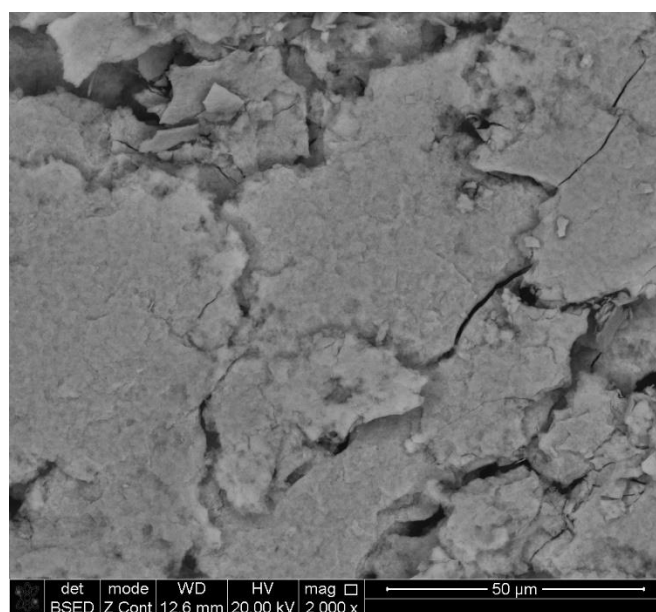

**Figure S6.** SEM image of the film structure obtained on tungsten electrode during electrochemical oxidation of W in oxalic acid under of pulse alternating current.

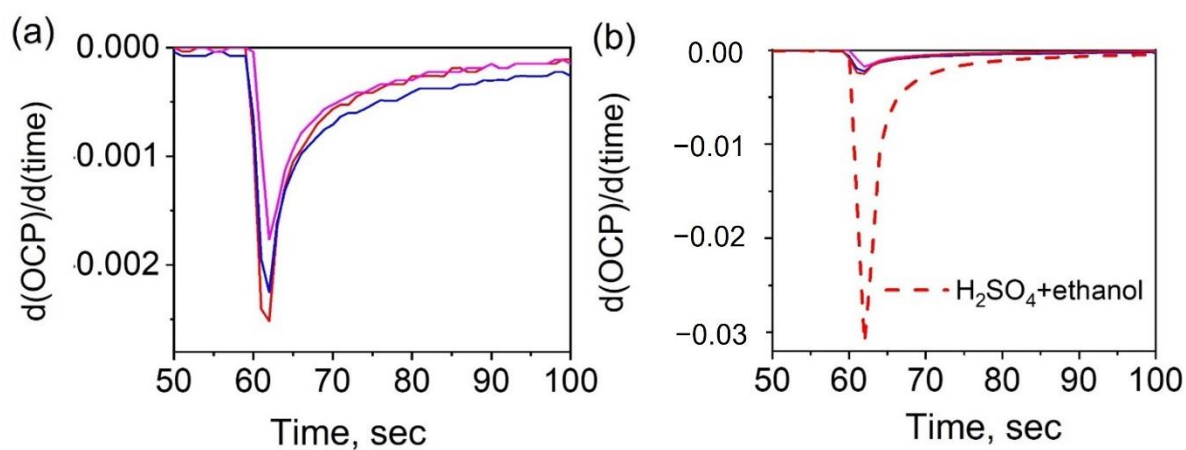

**Figure S7.** OCP decay derivative of  $d(\text{OCP})/d(\text{Time})$  vs. time curves of  $\text{WO}_3$  samples in  $\text{H}_2\text{SO}_4$  (a) and in  $\text{H}_2\text{SO}_4/\text{ethanol}$  (b) solution.

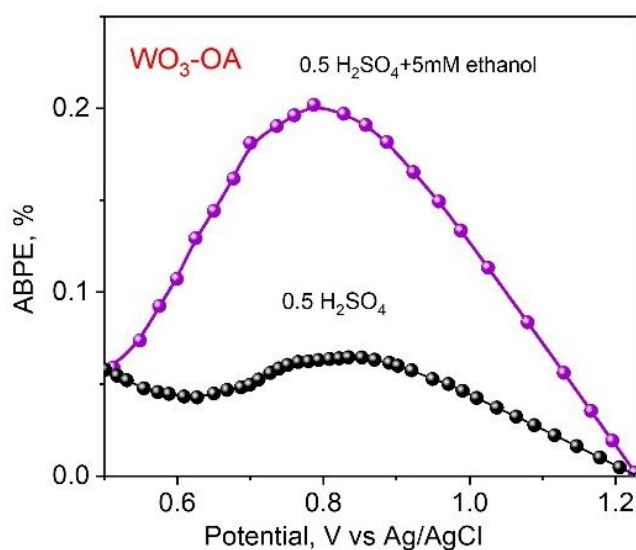

**Figure S8.** Applied bias photon-to-current efficiency (ABPE, %) as a function of applied potential for  $\text{WO}_3\text{-OA}$  sample.

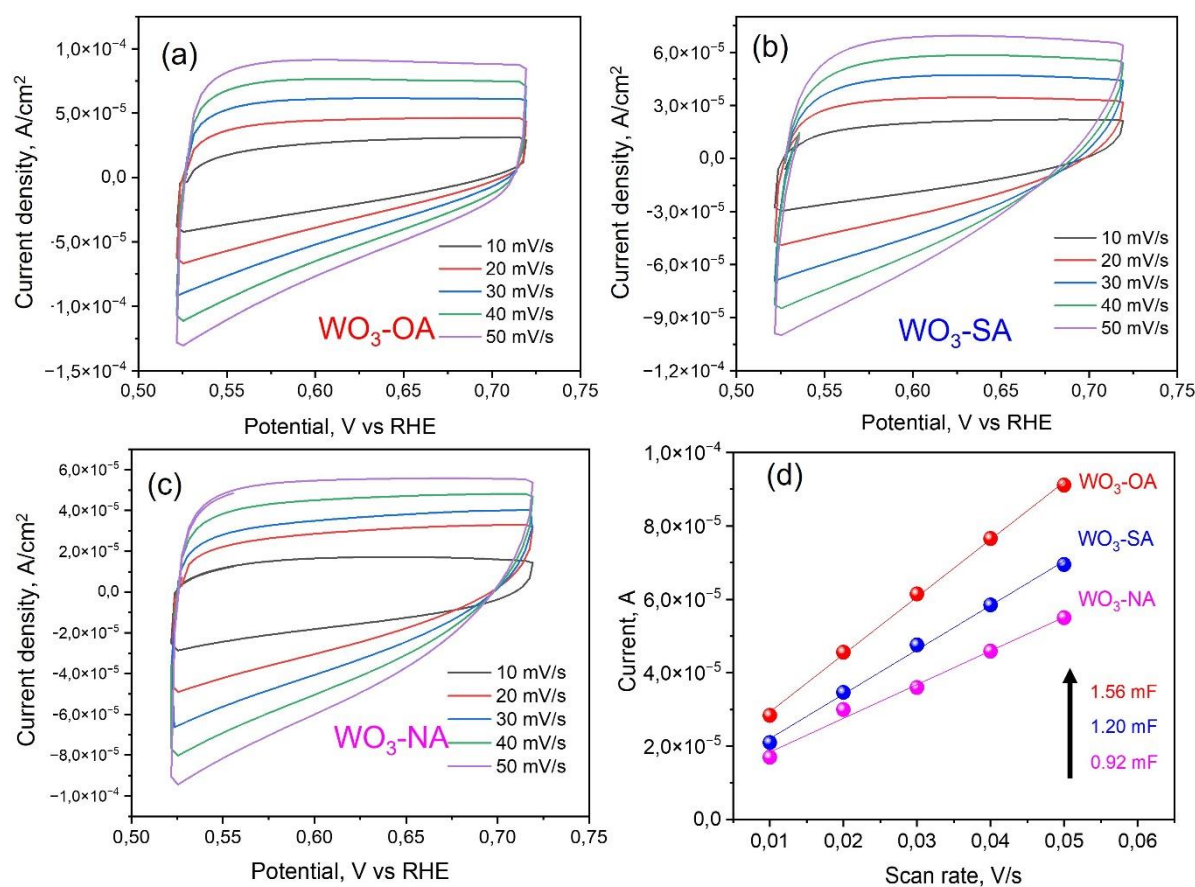

**Figure S9.** CVs at different scan rates in the potential range of 0.52–0.72 V vs the RHE (nonfaradaic region) in 0.5 M H<sub>2</sub>SO<sub>4</sub> solution of (a) WO<sub>3</sub>-OA, (b) WO<sub>3</sub>-SA and (c) WO<sub>3</sub>-NA; (d) Capacitive currents measured at 0.62 V vs the RHE as a function of scan rates.

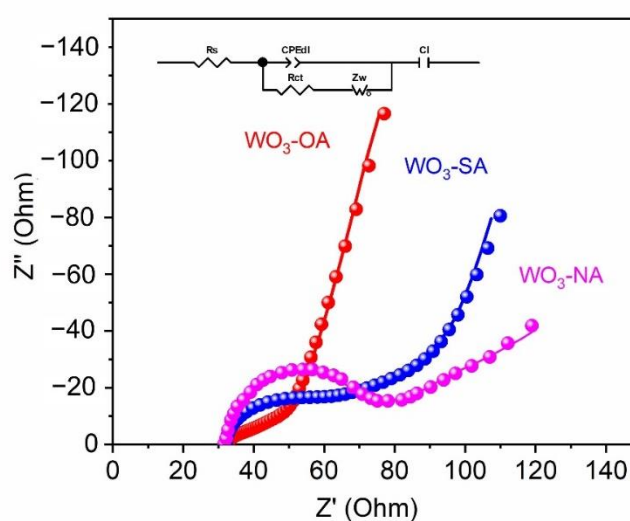

**Figure S10.** Nyquist plots of a WO<sub>3</sub> samples obtained in different electrolytes. The inset shows the equivalent circuit used for fitting the data with the resistances R<sub>s</sub> and R<sub>ct</sub>, the Warburg impedance Z<sub>w</sub>, the constant phase element CPE<sub>dl</sub> and the capacitance C<sub>l</sub>.
